# Supplementary material
Source: MDPI journal article supplement (https://www.mdpi.com/1424-2818/14/5/396)
Supplement: s1 [file s1]

### **Additional files 1**

**Table S1** The samples and GenBank accession numbers used in this study.

**Table S2** The distribution, climatic zone, phenology, and habitat of species in this study.

**Table S3** The species distribution data used in this study.

**Table S4** Niche PCA loadings.

**Table S1.** The samples and GenBank accession numbers used in this study.

| Species                             | ITS      | <i>atpI-H</i> | <i>matK</i> | <i>psbA-trnH</i> | <i>psbM-trnD</i> | <i>rbcL</i> | <i>rps19-rpl22</i> | <i>trnL-F</i> |
|-------------------------------------|----------|---------------|-------------|------------------|------------------|-------------|--------------------|---------------|
| <i>Gastrochilus acaulis</i>         | KM583455 | -             | KM583465    | -                | -                | KM583460    | -                  | -             |
| <i>Gastrochilus acinacifolius</i>   | MK357118 | KJ733334      | MK357139    | KJ733492         | MK357217         | -           | MK357161           | KJ733649      |
| <i>Gastrochilus acutifolius</i>     | MT225573 | -             | MK357140    | -                | MK357230         | MN239898    | MK357162           | -             |
| <i>Gastrochilus affinis</i>         | -        | -             | MK357141    | -                | MK357227         | -           | MK357163           | -             |
| <i>Gastrochilus alatus</i>          | -        | -             | -           | -                | MK357228         | -           | -                  | -             |
| <i>Gastrochilus bellinus</i>        | MK357123 | MN124427      | MK357142    | MN124427         | MK357240         | MN124427    | MK357165           | MK357202      |
| <i>Gastrochilus bigibbus</i>        | MN124439 | MN124439      | MN124439    | MN124439         | MN124439         | MN124439    | MN124439           | MN124439      |
| <i>Gastrochilus calceolaris</i>     | MK357125 | KJ733335      | MK357144    | KF545865         | MK357232         | KX527436    | MK357169           | KJ733650      |
| <i>Gastrochilus changjiangensis</i> | MK357124 | -             | -           | -                | MK357236         | -           | MK357166           | -             |
| <i>Gastrochilus ciliaris</i>        | -        | -             | MK357148    | -                | MK357225         | -           | MK357173           | -             |
| <i>Gastrochilus dasypogon</i>       | MK357129 | -             | MK357149    | -                | MK357219         | -           | MK357181           | MK357197      |
| <i>Gastrochilus deminutus</i>       | KY966600 | -             | KY966887    | -                | -                | -           | -                  | -             |
| <i>Gastrochilus distichus</i>       | KJ733414 | KJ733336      | KJ733571    | KJ733494         | -                | -           | -                  | KJ733651      |
| <i>Gastrochilus fargesii</i>        | KJ733415 | KJ733337      | KJ733572    | -                | -                | -           | -                  | KJ733652      |
| <i>Gastrochilus formosanus</i>      | KJ733416 | KJ733338      | KJ733573    | KJ733495         | MK357226         | JQ933340    | MK357174           | KJ733653      |
| <i>Gastrochilus fuscopunctatus</i>  | MK317970 | NC 035830     | MK357150    | NC 035830        | MK357231         | NC 035830   | MK357171           | MK357192      |
| <i>Gastrochilus guangtungensis</i>  | KJ733417 | KJ733339      | KJ733574    | KJ733496         | MN124428         | MN124428    | MN124428           | KJ733654      |
| <i>Gastrochilus gongshanensis</i>   | -        | MN124438      | MN124438    | MN124438         | MN124438         | MN124438    | MN124438           | MN124438      |
| <i>Gastrochilus intermedius</i>     | MK357121 | -             | MK357151    | -                | MK357213         | -           | MK357172           | MK357190      |
| <i>Gastrochilus japonicus</i>       | KY966598 | KJ733340      | KJ733575    | KJ733497         | KX871236         | KF296712    | KX871236           | KF545897      |
| <i>Gastrochilus linearifolius</i>   | MK357133 | -             | MK357136    | -                | MK357229         | -           | MK357187           | MK357194      |
| <i>Gastrochilus linii</i>           | -        | -             | MK357152    | -                | MK357224         | -           | MK357176           | MK357198      |
| <i>Gastrochilus malipoensis</i>     | -        | -             | MK357147    | -                | MK357235         | -           | MK357178           | MK357200      |
| <i>Gastrochilus matsuran</i>        | KT338700 | -             | -           | -                | -                | -           | -                  | -             |
| <i>Gastrochilus minutiflorus</i>    | -        | -             | MK357153    | -                | MK357215         | -           | MK357179           | -             |
| <i>Gastrochilus obliquus</i>        | MK357131 | KJ733341      | MK357137    | KJ733498         | MK357218         | KX527435    | MK357182           | KJ733656      |
| <i>Gastrochilus platycalcaratus</i> | MK357122 | -             | -           | -                | MK357222         | -           | MK357175           | -             |
| <i>Gastrochilus pseudodistichus</i> | MK357132 | -             | -           | -                | MK357221         | -           | MK357170           | -             |

|                                    |          |          |          |          |          |          |          |          |
|------------------------------------|----------|----------|----------|----------|----------|----------|----------|----------|
| <i>Gastrochilus rantabunensis</i>  | -        | -        | MK357155 | -        | MK357223 | -        | MK357184 | MK357193 |
| <i>Gastrochilus raraensis</i>      | KJ733420 | KJ733342 | MK357156 | KJ733499 | MK357239 | -        | -        | KJ733657 |
| <i>Gastrochilus somae</i>          | MK357128 | MN124436 | MN124436 | MN124436 | MK357220 | MN124436 | MK357180 | MN124436 |
| <i>Gastrochilus tianbaoensis</i>   | MK357120 | -        | MK357157 | -        | MK357214 | -        | MK357186 | MK357207 |
| <i>Gastrochilus yunnanensis</i>    | MK165469 | -        | MK357158 | -        | MK357212 | -        | MK357185 | -        |
| <i>Gastrochilus zhenyuanensis</i>  | MK357127 | -        | MK357146 | -        | MK357237 | -        | MK357168 | MK357199 |
| <b>Outgroups</b>                   |          |          |          |          |          |          |          |          |
| <i>Acampe ochracea</i>             | AB217525 | -        | DQ091314 | -        | -        | KF421859 | -        | DQ091438 |
| <i>Acampe papillosa</i>            | DQ091708 | MN124418 | DQ091315 | KJ733464 | MN124418 | JQ933201 | MN124418 | MN124418 |
| <i>Acampe rigida</i>               | AB217526 | KJ733307 | KY966701 | KJ733465 | MN124419 | MG905912 | MN124419 | KJ733622 |
| <i>Aerangis hariotiana</i>         | DQ091607 | -        | EF079271 | MF348708 | -        | MF349460 | DQ091467 | -        |
| <i>Aeranthus grandiflora</i>       | DQ091760 | KJ021013 | KF557958 | KJ021025 | -        | MT518907 | JQ905513 | -        |
| <i>Aerides multiflora</i>          | AY912258 | -        | AY557201 | KJ093259 | -        | JN005366 | -        | EF670403 |
| <i>Angraecum leonis</i>            | DQ091735 | -        | DQ091426 | -        | -        | MT518924 | -        | DQ091551 |
| <i>Cleisostoma discolor</i>        | DQ091696 | -        | -        | -        | -        | -        | -        | -        |
| <i>Cleisostoma gjellerupii</i>     | AB217545 | -        | AB217721 | -        | -        | -        | -        | -        |
| <i>Cleisostoma racemiferum</i>     | DQ091693 | KJ733325 | MK064248 | -        | -        | MN298852 | -        | KJ733640 |
| <i>Diaphananthe pellucida</i>      | DQ091620 | -        | MT518411 | -        | -        | MT519117 | DQ091502 | -        |
| <i>Pomatocalpa diffusum</i>        | EF670364 | -        | AB217752 | -        | -        | -        | -        | EF670432 |
| <i>Pomatocalpa spicatum</i>        | EF670365 | KJ733359 | EF655811 | KJ733518 | MN124411 | MN124411 | MN124411 | KJ733675 |
| <i>Robiquetia cerina</i>           | DQ091701 | -        | -        | -        | -        | -        | -        | -        |
| <i>Robiquetia spathulata</i>       | DQ091702 | KJ733364 | KF421855 | KJ733523 | MN124410 | KF421866 | MN124410 | KJ733680 |
| <i>Stereochilus dalatensis</i>     | EF670386 | KJ733375 | KY966958 | KJ733534 | MN124431 | MN124431 | MN124431 | EF670420 |
| <i>Trichoglottis ionosma</i>       | AB217589 | -        | AB217765 | -        | -        | -        | -        | -        |
| <i>Trichoglottis geminata</i>      | DQ091716 | -        | -        | -        | -        | -        | -        | -        |
| <i>Trichoglottis latisejala</i>    | AB217593 | MN124432 | AB217769 | MN124432 | MN124432 | MN124432 | MN124432 | MN124432 |
| <i>Trichoglottis seidenfadenii</i> | DQ091714 | -        | MF349981 | MF348713 | -        | -        | -        | -        |
| <i>Vandopsis gigantea</i>          | EF670376 | KJ733381 | KC823042 | KJ733541 | MN124403 | JQ933519 | MN124403 | KJ733697 |
| <i>Vandopsis lissochiloides</i>    | EF670377 | MN124443 | EF655806 | MN124443 | MN124443 | MN124443 | MN124443 | EF670418 |

**Table S2.** The distribution, climatic zone, phenology, and habitat of species in this study.

| Species                     | Distribution                                                    | Climatic zone | Altitude (m) | Phenology | Habitat                        |
|-----------------------------|-----------------------------------------------------------------|---------------|--------------|-----------|--------------------------------|
| <i>Gastrochilus acaulis</i> | India, Sri Lanka                                                | A             | 900-1550     | 8-10      | evergreen forests              |
| <i>G. acinacifolius</i>     | China (Hainan)                                                  | A             | 1000-1200    | 9-12      | montane forests                |
| <i>G. acutifolius</i>       | Nepal, Myanmar, Vietnam                                         | A             | 1450-1700    | 11-12     | evergreen broad-leaved forests |
| <i>G. affinis</i>           | Bhutan, India, Nepal                                            | B             | 2300-3000    | 3-4       | forests                        |
| <i>G. alatus</i>            | China                                                           | B             | 2600-2700    | 4-5       | forests                        |
| <i>G. bellinus</i>          | Burma, China, Thailand, Vietnam                                 | AB            | 600-1700     | 3-4       | forests                        |
| <i>G. bigibbus</i>          | India, Malaysia                                                 | A             | 800-1400     | 9-12      | dense forests                  |
| <i>G. calceolaris</i>       | Bhutan, India, Nepal, Burma, China, Malaysia, Thailand, Vietnam | AB            | 200-2300     | 3-4       | forests                        |
| <i>G. changjiangensis</i>   | China (Hainan)                                                  | A             | 500-800      | 3-4       | rainforests                    |
| <i>G. ciliaris</i>          | Japan, China (Taiwan)                                           | AB            | 1600-1800    | 4-7       | forests                        |
| <i>G. dasypogon</i>         | Bhutan, India, Nepal, China, Thailand, Vietnam                  | AB            | 300-1000     | 10        | forests                        |
| <i>G. deminutus</i>         | Thailand                                                        | A             | 1500-1600    | unknown   | forests                        |
| <i>G. distichus</i>         | Bhutan, China, India, Nepal                                     | AB            | 1520-2700    | 1-5       | rainforests                    |
| <i>G. fargesii</i>          | China                                                           | B             | ~2300        | 5-6       | forests                        |
| <i>G. formosanus</i>        | China                                                           | A             | 500-2500     | 1-12      | forests                        |
| <i>G. fuscopunctatus</i>    | China                                                           | AB            | 1000-2500    | 1-7       | dense forests                  |
| <i>G. guangtungensis</i>    | China                                                           | AB            | ~1500        | 10        | forests                        |
| <i>G. gongshanensis</i>     | China (Yunnan)                                                  | B             | ~3200        | unknown   | forests                        |
| <i>G. intermedius</i>       | China, India, Thailand, Vietnam                                 | AB            | ~1500        | 10        | forests                        |
| <i>G. japonicus</i>         | China, Japan                                                    | AB            | 200-2000     | 6-9       | pinus, broad-leaved forests    |
| <i>G. linearifolius</i>     | China, India                                                    | B             | ~1600        | 9         | forests                        |
| <i>G. linii</i>             | China (Taiwan)                                                  | A             | 1400-2000    | 5         | coniferous forests             |
| <i>G. malipoensis</i>       | China                                                           | AB            | ~1300        | 3-4       | forests                        |
| <i>G. matsuran</i>          | Japan, China (Taiwan)                                           | AB            | 500-2500     | 1-2       | forests                        |
| <i>G. minutiflorus</i>      | Vietnam                                                         | A             | 850-900      | 3-5, 10   | evergreen mountain forests     |
| <i>G. obliquus</i>          | Bhutan, Burma, China, India, Laos, Nepal, Thailand, Vietnam     | AB            | 800-1400     | 10        | montane forests                |
| <i>G. platycalcaratus</i>   | Burma, China, Thailand                                          | AB            | 700-800      | 3         | dense forests                  |

|                                |                                                                                                   |    |           |          |                                  |
|--------------------------------|---------------------------------------------------------------------------------------------------|----|-----------|----------|----------------------------------|
| <i>G. pseudodistichus</i>      | Bhutan, China, India, Thailand, Vietnam                                                           | AB | 1000-2600 | 6        | coniferous forests               |
| <i>G. rantabunensis</i>        | China                                                                                             | AB | ~2000     | 1-2 or 7 | coniferous forests               |
| <i>G. raraensis</i>            | China (Taiwan)                                                                                    | A  | 1500-2200 | 1-2      | coniferous forests               |
| <i>G. somae</i>                | China (Taiwan)                                                                                    | A  | 1000-2000 | 6-9      | forests                          |
| <i>G. tianbaoensis</i>         | China (Yunnan), Vietnam (Lao Cai)                                                                 | A  | 1000-1100 | 11-12    | primary forests                  |
| <i>G. yunnanensis</i>          | Bangladesh, China, Thailand, Vietnam                                                              | AB | ~ 1500    | 10       | dense forests                    |
| <i>G. zhenyuanensis</i>        | China                                                                                             | B  | 1290-2200 | 2-3      | evergreen broad-leaved forests   |
| <b>Outgroups</b>               |                                                                                                   |    |           |          |                                  |
| <i>Acampe ochracea</i>         | Bhutan, Burma, China, India, Laos, Sri Lanka, Thailand, Vietnam                                   | AB | 700-1100  | 12       | forests                          |
| <i>Acampe papillosa</i>        | Bangladesh, Bhutan, Burma, China, Laos, Nepal, India, Thailand, Vietnam                           | AB | ~500      | 11       | forests                          |
| <i>Acampe rigida</i>           | Bhutan, Burma, Cambodia, China, India, Malaysia, Nepal, Sri Lanka, Thailand, Vietnam              | A  | 300-800   | 8-9      | forests                          |
| <i>Aerangis hariatiana</i>     | Comoro Islands                                                                                    | A  | 200-1600  | 3-5      | rainforests                      |
| <i>Aerantes grandiflora</i>    | Madagascar                                                                                        | A  | 0-1200    | 5-8      | humid rainforests                |
| <i>Aerides multiflora</i>      | India, Nepal, Thailand, China, Bhutan, Cambodia, Vietnam, Myanmar                                 | AB | 0-1100    | 3-7      | semi-deciduous/deciduous forests |
| <i>Angraecum leonis</i>        | the Comoros Islands and Madagascar                                                                | A  | 200-1200  | 4-5      | forests                          |
| <i>Cleisostoma discolor</i>    | Indonesia                                                                                         | A  | 350-1500  | 4-5      | lowland montane forests          |
| <i>Cleisostoma gjellerupii</i> | New Guinea                                                                                        | A  | ~3000     | 3-4      | rainforests                      |
| <i>Cleisostoma racemiferum</i> | Bhutan, Burma, China, India, Laos, Nepal, Thailand, Vietnam                                       | AB | 600-2150  | 5-6      | forests                          |
| <i>Diaphananthe pellucida</i>  | east Africa                                                                                       | A  | 600-1800  | unknown  | evergreen forests                |
| <i>Pomatocalpa diffusum</i>    | Indonesia, Malaysia, Philippines, Thailand, Myanmar                                               | A  | ~800      | 2-5      | rainforests                      |
| <i>Pomatocalpa spicatum</i>    | Bhutan, Burma, China, India, Indonesia, Laos, Malaysia, Philippines, Sri Lanka, Thailand, Vietnam | AB | -         | 4        | montane forests                  |
| <i>Robiquetia cerina</i>       | Philippines, Indonesia                                                                            | A  | >350      | -        | forests                          |
| <i>Robiquetia spathulata</i>   | Bhutan, Burma, Cambodia, China, India, Indonesia, Laos, Malaysia, Singapore, Thailand, Vietnam    | AB | 400-800   | 9-10     | montane forests                  |
| <i>Stereochilus dalatensis</i> | Thailand, Vietnam                                                                                 | A  | 800-1400  | 4-5      | forests                          |

|                                    |                                                 |    |          |       |                                   |
|------------------------------------|-------------------------------------------------|----|----------|-------|-----------------------------------|
| <i>Trichoglottis ionosma</i>       | Phillipines                                     | A  | 300-1300 |       | rainforests                       |
| <i>Trichoglottis geminata</i>      | Philippines, Indonesia, Malaysia                | A  | ~1100    | 3-4   | rainforests                       |
| <i>Trichoglottis latisejala</i>    | Philippines                                     | A  | 0-1000   | 11-12 | rainforests                       |
| <i>Trichoglottis seidenfadenii</i> | Vietnam                                         | A  | ~700     | -     | semi-deciduous/deciduous forests  |
| <i>Vandopsis gigantea</i>          | Burma, China, Laos, Malaysia, Thailand, Vietnam | AB | 300-1100 | 3-7   | evergreen, semi-deciduous forests |
| <i>Vandopsis lissochiloides</i>    | Indonesia, Philippines, Laos                    | A  | ~1100    | 7-8   | evergreen forests                 |

---

Note: (1) the sources of distribution information are: <https://tropicos.org>, <https://www.gbif.org>, <http://iplant.cn>, <http://powo.kew.org>, <http://www.orchidspecies.com> and Liu et al. (2019). (2) Climatic zone: A, tropical; B, subtropical.

**Table S3.** The species distribution data used in this study.

| <b>Species</b>                    | <b>Latitude</b> | <b>Longitude</b> |
|-----------------------------------|-----------------|------------------|
| <i>Gastrochilus acaulis</i>       | 11.65           | 78.166667        |
| <i>Gastrochilus acinacifolius</i> | 18.74           | 109.17           |
| <i>Gastrochilus acutifolius</i>   | 26.921564       | 89.535567        |
| <i>Gastrochilus acutifolius</i>   | 27.059544       | 90.499184        |
| <i>Gastrochilus acutifolius</i>   | 27.75           | 88.5             |
| <i>Gastrochilus acutifolius</i>   | 20.350333       | 105.593833       |
| <i>Gastrochilus acutifolius</i>   | 27.183761       | 90.528824        |
| <i>Gastrochilus acutifolius</i>   | 17.38944        | 106.21305        |
| <i>Gastrochilus acutifolius</i>   | 17.6725         | 105.96666        |
| <i>Gastrochilus acutifolius</i>   | 21.010278       | 104.501667       |
| <i>Gastrochilus acutifolius</i>   | 20.863889       | 104.521389       |
| <i>Gastrochilus acutifolius</i>   | 27.5544         | 88.4517          |
| <i>Gastrochilus affinis</i>       | 27.5544         | 88.4517          |
| <i>Gastrochilus alatus</i>        | 25.04           | 102.73           |
| <i>Gastrochilus bellinus</i>      | 20.124292       | 99.179935        |
| <i>Gastrochilus bellinus</i>      | 22.269167       | 103.242778       |
| <i>Gastrochilus bellinus</i>      | 22.01071        | 100.799775       |
| <i>Gastrochilus bellinus</i>      | 41.81027        | -72.25583        |
| <i>Gastrochilus bellinus</i>      | 27.5544         | 88.4517          |
| <i>Gastrochilus bigibbus</i>      | 25.04           | 102.73           |
| <i>Gastrochilus bigibbus</i>      | 108.34          | 22.82            |
| <i>Gastrochilus bigibbus</i>      | 24.99           | 102.73           |
| <i>Gastrochilus calceolaris</i>   | 35.86           | 104.2            |
| <i>Gastrochilus calceolaris</i>   | 12.110298       | 108.698773       |
| <i>Gastrochilus calceolaris</i>   | 27.591954       | 85.372023        |
| <i>Gastrochilus calceolaris</i>   | 3.416667        | 101.783333       |
| <i>Gastrochilus calceolaris</i>   | 29.32           | 95.33            |
| <i>Gastrochilus calceolaris</i>   | 27.468209       | 87.703002        |
| <i>Gastrochilus calceolaris</i>   | 39.732207       | -104.961468      |
| <i>Gastrochilus calceolaris</i>   | 23.9            | 99               |
| <i>Gastrochilus calceolaris</i>   | 24.5            | 98.6             |
| <i>Gastrochilus calceolaris</i>   | 27.709106       | 96.466142        |
| <i>Gastrochilus calceolaris</i>   | 23.531078       | 99.411861        |
| <i>Gastrochilus calceolaris</i>   | 23.473501       | 99.8277          |
| <i>Gastrochilus calceolaris</i>   | 24.58669        | 98.689166        |
| <i>Gastrochilus calceolaris</i>   | 27.740736       | 98.66582         |
| <i>Gastrochilus calceolaris</i>   | 22.01071        | 100.799775       |
| <i>Gastrochilus calceolaris</i>   | 23.880344       | 100.092756       |
| <i>Gastrochilus calceolaris</i>   | 24.580446       | 99.92854         |
| <i>Gastrochilus calceolaris</i>   | 27.82308        | 99.706013        |
| <i>Gastrochilus calceolaris</i>   | 23.763342       | 98.82524         |
| <i>Gastrochilus calceolaris</i>   | 24.615701       | 100.709787       |
| <i>Gastrochilus calceolaris</i>   | 18.252625       | 109.511923       |

|                                     |           |            |
|-------------------------------------|-----------|------------|
| <i>Gastrochilus calceolaris</i>     | 18.252013 | 109.504134 |
| <i>Gastrochilus calceolaris</i>     | 18.516726 | 110.029085 |
| <i>Gastrochilus calceolaris</i>     | 11.652236 | 116.455078 |
| <i>Gastrochilus calceolaris</i>     | 17.6725   | 105.96666  |
| <i>Gastrochilus calceolaris</i>     | 12.09222  | 108.37555  |
| <i>Gastrochilus calceolaris</i>     | 20.73777  | 104.94166  |
| <i>Gastrochilus calceolaris</i>     | 22.2175   | 106.074167 |
| <i>Gastrochilus calceolaris</i>     | 22.27388  | 105.43277  |
| <i>Gastrochilus calceolaris</i>     | 12.5      | 108.5      |
| <i>Gastrochilus calceolaris</i>     | 20.985    | 104.47944  |
| <i>Gastrochilus calceolaris</i>     | 23.15     | 104.983333 |
| <i>Gastrochilus calceolaris</i>     | 12.18333  | 108.71666  |
| <i>Gastrochilus calceolaris</i>     | 12.13333  | 108.65     |
| <i>Gastrochilus calceolaris</i>     | 15.066667 | 107.983333 |
| <i>Gastrochilus calceolaris</i>     | 11.731111 | 109.143056 |
| <i>Gastrochilus calceolaris</i>     | 19.078056 | 104.3475   |
| <i>Gastrochilus calceolaris</i>     | 19.051944 | 104.615833 |
| <i>Gastrochilus calceolaris</i>     | 21.021389 | 104.513056 |
| <i>Gastrochilus calceolaris</i>     | 28.253008 | 83.938548  |
| <i>Gastrochilus calceolaris</i>     | 31.712092 | 88.118532  |
| <i>Gastrochilus calceolaris</i>     | 22.883478 | 79.616202  |
| <i>Gastrochilus calceolaris</i>     | 36.519977 | 103.891767 |
| <i>Gastrochilus calceolaris</i>     | 26.886395 | 98.206742  |
| <i>Gastrochilus calceolaris</i>     | 27.5544   | 88.4517    |
| <i>Gastrochilus calceolaris</i>     | 19.254108 | 110.45517  |
| <i>Gastrochilus calceolaris</i>     | 11.318545 | 116.562386 |
| <i>Gastrochilus calceolaris</i>     | 24.399048 | 113.987821 |
| <i>Gastrochilus calceolaris</i>     | 25.116213 | 99.162598  |
| <i>Gastrochilus calceolaris</i>     | 26.901731 | 98.869207  |
| <i>Gastrochilus calceolaris</i>     | 23.146851 | 99.246047  |
| <i>Gastrochilus calceolaris</i>     | 22.555882 | 99.932102  |
| <i>Gastrochilus calceolaris</i>     | 25.020615 | 98.490007  |
| <i>Gastrochilus calceolaris</i>     | 25.841921 | 98.857727  |
| <i>Gastrochilus calceolaris</i>     | 24.705249 | 97.931861  |
| <i>Gastrochilus calceolaris</i>     | 25.285556 | 98.705556  |
| <i>Gastrochilus calceolaris</i>     | 24.873056 | 98.725278  |
| <i>Gastrochilus calceolaris</i>     | 25.700556 | 98.682778  |
| <i>Gastrochilus calceolaris</i>     | 25.751944 | 98.706389  |
| <i>Gastrochilus calceolaris</i>     | 25.294722 | 98.700278  |
| <i>Gastrochilus changjiangensis</i> | 19.51     | 109.58     |
| <i>Gastrochilus ciliaris</i>        | 24.635177 | 121.387664 |
| <i>Gastrochilus ciliaris</i>        | 24.171389 | 121.409444 |
| <i>Gastrochilus ciliaris</i>        | 24.1      | 121.182222 |
| <i>Gastrochilus ciliaris</i>        | 24.066667 | 121.166667 |
| <i>Gastrochilus dasypogon</i>       | 13        | 102.25     |



|                                |           |            |
|--------------------------------|-----------|------------|
| <i>Gastrochilus dasypogon</i>  | 18.333333 | 99.866667  |
| <i>Gastrochilus dasypogon</i>  | 19.583333 | 98.833333  |
| <i>Gastrochilus dasypogon</i>  | 18.116667 | 100.15     |
| <i>Gastrochilus dasypogon</i>  | 22.01071  | 100.799775 |
| <i>Gastrochilus dasypogon</i>  | 41.81027  | -72.25583  |
| <i>Gastrochilus deminutus</i>  | 108.34    | 22.82      |
| <i>Gastrochilus distichus</i>  | 20.59     | 78.96      |
| <i>Gastrochilus distichus</i>  | 35.86     | 104.2      |
| <i>Gastrochilus distichus</i>  | 27.73     | 88.63      |
| <i>Gastrochilus distichus</i>  | 25.7      | 100.1      |
| <i>Gastrochilus distichus</i>  | 23.9      | 99         |
| <i>Gastrochilus distichus</i>  | 24.5      | 98.6       |
| <i>Gastrochilus distichus</i>  | 24.927222 | 98.7525    |
| <i>Gastrochilus distichus</i>  | 25.584234 | 100.222124 |
| <i>Gastrochilus distichus</i>  | 26.11116  | 99.951049  |
| <i>Gastrochilus distichus</i>  | 24.58669  | 98.689166  |
| <i>Gastrochilus distichus</i>  | 23.763342 | 98.82524   |
| <i>Gastrochilus distichus</i>  | 27.5544   | 88.4517    |
| <i>Gastrochilus distichus</i>  | 36.519977 | 103.891767 |
| <i>Gastrochilus distichus</i>  | 28.253008 | 83.938548  |
| <i>Gastrochilus distichus</i>  | 31.712092 | 88.118532  |
| <i>Gastrochilus fargesii</i>   | 30.36     | 102.81     |
| <i>Gastrochilus fargesii</i>   | 25.584234 | 100.222124 |
| <i>Gastrochilus formosanus</i> | 24.453876 | 121.33826  |
| <i>Gastrochilus formosanus</i> | 24.660671 | 121.229531 |
| <i>Gastrochilus formosanus</i> | 24.575612 | 121.337313 |
| <i>Gastrochilus formosanus</i> | 24.596664 | 120.817371 |
| <i>Gastrochilus formosanus</i> | 35.86     | 104.2      |
| <i>Gastrochilus formosanus</i> | 24.646985 | 121.24302  |
| <i>Gastrochilus formosanus</i> | 23.405975 | 120.93116  |
| <i>Gastrochilus formosanus</i> | 24.628637 | 121.205206 |
| <i>Gastrochilus formosanus</i> | 24.344579 | 121.302579 |
| <i>Gastrochilus formosanus</i> | 31.08     | 103.26     |
| <i>Gastrochilus formosanus</i> | 24.033333 | 121.233333 |
| <i>Gastrochilus formosanus</i> | 22.834667 | 121.0105   |
| <i>Gastrochilus formosanus</i> | 24.383333 | 121.35     |
| <i>Gastrochilus formosanus</i> | 24.754444 | 121.316389 |
| <i>Gastrochilus formosanus</i> | 24.65     | 121.433333 |
| <i>Gastrochilus formosanus</i> | 22.4      | 120.75     |
| <i>Gastrochilus formosanus</i> | 23.6      | 120.716667 |
| <i>Gastrochilus formosanus</i> | 23        | 120.716667 |
| <i>Gastrochilus formosanus</i> | 24.583333 | 121.333333 |
| <i>Gastrochilus formosanus</i> | 23.666667 | 121        |
| <i>Gastrochilus formosanus</i> | 24.066667 | 121.166667 |
| <i>Gastrochilus formosanus</i> | 23.900556 | 120.681389 |

|                                    |           |            |
|------------------------------------|-----------|------------|
| <i>Gastrochilus formosanus</i>     | 25        | 121.3      |
| <i>Gastrochilus formosanus</i>     | 23.26     | 120.9275   |
| <i>Gastrochilus formosanus</i>     | 23.266667 | 121.266667 |
| <i>Gastrochilus formosanus</i>     | 22.621944 | 120.753333 |
| <i>Gastrochilus formosanus</i>     | 24.25     | 121.633333 |
| <i>Gastrochilus formosanus</i>     | 24.327222 | 121.112778 |
| <i>Gastrochilus formosanus</i>     | 24.25     | 121.166667 |
| <i>Gastrochilus formosanus</i>     | 24.3525   | 121.301944 |
| <i>Gastrochilus formosanus</i>     | 23.483333 | 120.883333 |
| <i>Gastrochilus formosanus</i>     | 24.766667 | 121.316667 |
| <i>Gastrochilus formosanus</i>     | 24.766667 | 121.3      |
| <i>Gastrochilus formosanus</i>     | 23.509593 | 120.867092 |
| <i>Gastrochilus formosanus</i>     | 23.514831 | 120.86787  |
| <i>Gastrochilus formosanus</i>     | 23.511944 | 120.870987 |
| <i>Gastrochilus formosanus</i>     | 23.515097 | 120.861534 |
| <i>Gastrochilus formosanus</i>     | 23.51618  | 120.860818 |
| <i>Gastrochilus formosanus</i>     | 23.51384  | 120.869996 |
| <i>Gastrochilus formosanus</i>     | 23.511398 | 120.86572  |
| <i>Gastrochilus formosanus</i>     | 23.512302 | 120.867285 |
| <i>Gastrochilus formosanus</i>     | 24.17     | 121.32     |
| <i>Gastrochilus formosanus</i>     | 23.63     | 120.91     |
| <i>Gastrochilus formosanus</i>     | 24.75     | 121.46     |
| <i>Gastrochilus formosanus</i>     | 23.03     | 120.77     |
| <i>Gastrochilus formosanus</i>     | 23.53     | 121.27     |
| <i>Gastrochilus formosanus</i>     | 22.63     | 120.71     |
| <i>Gastrochilus formosanus</i>     | 30.066708 | 102.758313 |
| <i>Gastrochilus formosanus</i>     | 25.841921 | 98.857727  |
| <i>Gastrochilus formosanus</i>     | 23.592778 | 120.882778 |
| <i>Gastrochilus formosanus</i>     | 24.1      | 121.181944 |
| <i>Gastrochilus formosanus</i>     | 23.5275   | 120.769167 |
| <i>Gastrochilus formosanus</i>     | 24.463056 | 121.250833 |
| <i>Gastrochilus formosanus</i>     | 24.146667 | 121.613889 |
| <i>Gastrochilus formosanus</i>     | 23.9075   | 121.435556 |
| <i>Gastrochilus fuscopunctatus</i> | 24.783333 | 121.45     |
| <i>Gastrochilus fuscopunctatus</i> | 23.866667 | 121.55     |
| <i>Gastrochilus fuscopunctatus</i> | 24.866667 | 121.483333 |
| <i>Gastrochilus fuscopunctatus</i> | 23.266667 | 121.266667 |
| <i>Gastrochilus fuscopunctatus</i> | 24.766667 | 121.316667 |
| <i>Gastrochilus fuscopunctatus</i> | 23        | 120.716667 |
| <i>Gastrochilus fuscopunctatus</i> | 24.1      | 121.182222 |
| <i>Gastrochilus fuscopunctatus</i> | 24.783333 | 121.6      |
| <i>Gastrochilus fuscopunctatus</i> | 24.48     | 121.19     |
| <i>Gastrochilus fuscopunctatus</i> | 24.7875   | 121.475    |
| <i>Gastrochilus guangtungensis</i> | 24.399048 | 113.987821 |
| <i>Gastrochilus guangtungensis</i> | 27.740736 | 98.66582   |

|                                   |            |            |
|-----------------------------------|------------|------------|
| <i>Gastrochilus gongshanensis</i> | 27.74      | 98.66      |
| <i>Gastrochilus intermedius</i>   | 29.32      | 95.33      |
| <i>Gastrochilus intermedius</i>   | 18.252013  | 109.504134 |
| <i>Gastrochilus intermedius</i>   | 18.516726  | 110.029085 |
| <i>Gastrochilus intermedius</i>   | 29.351226  | 107.616845 |
| <i>Gastrochilus intermedius</i>   | 22.555882  | 99.932102  |
| <i>Gastrochilus japonicus</i>     | 24.944423  | 121.337079 |
| <i>Gastrochilus japonicus</i>     | 24.963936  | 121.525443 |
| <i>Gastrochilus japonicus</i>     | 24.985174  | 121.379343 |
| <i>Gastrochilus japonicus</i>     | 22.416667  | 120.883333 |
| <i>Gastrochilus japonicus</i>     | 22.633333  | 120.933333 |
| <i>Gastrochilus japonicus</i>     | 22.616667  | 120.966667 |
| <i>Gastrochilus japonicus</i>     | 23.916667  | 120.883333 |
| <i>Gastrochilus japonicus</i>     | 24.639444  | 121.1025   |
| <i>Gastrochilus japonicus</i>     | 22.728443  | 120.781116 |
| <i>Gastrochilus japonicus</i>     | 22.730763  | 120.831708 |
| <i>Gastrochilus japonicus</i>     | 22.733553  | 120.822826 |
| <i>Gastrochilus japonicus</i>     | 22.88      | 121.17     |
| <i>Gastrochilus japonicus</i>     | 34.883301  | 135.2      |
| <i>Gastrochilus japonicus</i>     | 41.80916   | -72.25416  |
| <i>Gastrochilus linearifolius</i> | 29.32      | 95.33      |
| <i>Gastrochilus linearifolius</i> | 27.5544    | 88.4517    |
| <i>Gastrochilus linii</i>         | 24.15      | 120.67     |
| <i>Gastrochilus malipoensis</i>   | 104.787778 | 23.131944  |
| <i>Gastrochilus malipoensis</i>   | 33.2       | 129.3      |
| <i>Gastrochilus malipoensis</i>   | 35.5       | 137.6      |
| <i>Gastrochilus malipoensis</i>   | 37.3       | 140.9      |
| <i>Gastrochilus malipoensis</i>   | 38.3       | 140.9      |
| <i>Gastrochilus malipoensis</i>   | 33.5       | 130.9      |
| <i>Gastrochilus malipoensis</i>   | 38.3       | 141.1      |
| <i>Gastrochilus malipoensis</i>   | 23.640556  | 120.794167 |
| <i>Gastrochilus malipoensis</i>   | 23.1518    | 120.805    |
| <i>Gastrochilus malipoensis</i>   | 35.4       | 137.4      |
| <i>Gastrochilus malipoensis</i>   | 38.4       | 141.1      |
| <i>Gastrochilus malipoensis</i>   | 32.8       | 130.7      |
| <i>Gastrochilus matsuran</i>      | 23.151844  | 120.805266 |
| <i>Gastrochilus minutiflorus</i>  | 21.193611  | 106.064167 |
| <i>Gastrochilus obliquus</i>      | 11.430155  | 107.425915 |
| <i>Gastrochilus obliquus</i>      | 13.798265  | 100.550072 |
| <i>Gastrochilus obliquus</i>      | 22.25997   | 96.69933   |
| <i>Gastrochilus obliquus</i>      | 27.63481   | 97.36986   |
| <i>Gastrochilus obliquus</i>      | 22.01071   | 100.799775 |
| <i>Gastrochilus obliquus</i>      | 11.628611  | 105.873889 |
| <i>Gastrochilus obliquus</i>      | 27.5544    | 88.4517    |
| <i>Gastrochilus obliquus</i>      | 21.957355  | 100.452547 |

|                                     |             |             |
|-------------------------------------|-------------|-------------|
| <i>Gastrochilus obliquus</i>        | 21.475834   | 101.56752   |
| <i>Gastrochilus obliquus</i>        | 13.25       | 101.833     |
| <i>Gastrochilus platycalcaratus</i> | 21.475834   | 101.56752   |
| <i>Gastrochilus pseudodistichus</i> | 24.220158   | 120.989057  |
| <i>Gastrochilus pseudodistichus</i> | 21.91       | 95.96       |
| <i>Gastrochilus pseudodistichus</i> | 15.87       | 100.99      |
| <i>Gastrochilus pseudodistichus</i> | 20.59       | 78.96       |
| <i>Gastrochilus pseudodistichus</i> | 27.73       | 88.63       |
| <i>Gastrochilus pseudodistichus</i> | 35.86       | 104.2       |
| <i>Gastrochilus pseudodistichus</i> | 25.917276   | 98.750319   |
| <i>Gastrochilus pseudodistichus</i> | 28          | 98.5        |
| <i>Gastrochilus pseudodistichus</i> | 22.983563   | 103.687613  |
| <i>Gastrochilus pseudodistichus</i> | 27.740736   | 98.66582    |
| <i>Gastrochilus pseudodistichus</i> | 23.125462   | 104.702829  |
| <i>Gastrochilus pseudodistichus</i> | 23.437468   | 104.672252  |
| <i>Gastrochilus pseudodistichus</i> | 22.555882   | 99.932102   |
| <i>Gastrochilus pseudodistichus</i> | 20.760278   | 104.893611  |
| <i>Gastrochilus pseudodistichus</i> | 20.7275     | 104.89527   |
| <i>Gastrochilus pseudodistichus</i> | 23.136389   | 105.013333  |
| <i>Gastrochilus pseudodistichus</i> | 23.115833   | 105.03      |
| <i>Gastrochilus pseudodistichus</i> | 23.11666    | 105.13333   |
| <i>Gastrochilus pseudodistichus</i> | 23.18333    | 105.3       |
| <i>Gastrochilus pseudodistichus</i> | 23.26666    | 105.36666   |
| <i>Gastrochilus pseudodistichus</i> | 15.066667   | 107.983333  |
| <i>Gastrochilus pseudodistichus</i> | 15.073      | 108.026     |
| <i>Gastrochilus pseudodistichus</i> | 22.73333    | 105.83333   |
| <i>Gastrochilus pseudodistichus</i> | 27.5544     | 88.4517     |
| <i>Gastrochilus pseudodistichus</i> | 27.75       | 97.75       |
| <i>Gastrochilus pseudodistichus</i> | 24.615701   | 100.709787  |
| <i>Gastrochilus rantabunensis</i>   | 26.38       | 112.39      |
| <i>Gastrochilus raraensis</i>       | 24.70028297 | 121.4795621 |
| <i>Gastrochilus raraensis</i>       | 23.78333333 | 121.3833333 |
| <i>Gastrochilus raraensis</i>       | 23.26666667 | 121.2666667 |
| <i>Gastrochilus raraensis</i>       | 24.76666667 | 121.3166667 |
| <i>Gastrochilus somae</i>           | 23.800864   | 120.847995  |
| <i>Gastrochilus tianbaoensis</i>    | 22.01       | 100.8       |
| <i>Gastrochilus yunnanensis</i>     | 23.12       | 104.7       |
| <i>Gastrochilus zhenyuanensis</i>   | 22.78       | 100.97      |
| <i>Gastrochilus zhenyuanensis</i>   | 26.11       | 99.94       |

**Table S4.** Niche PCA loadings.

| Variables | PC1 loading  |
|-----------|--------------|
| elevation | -0.746457137 |
| bio2      | -0.740638224 |
| bio3      | -0.480806134 |
| bio15     | -0.306077195 |
| bio7      | -0.088044733 |
| bio11     | 0.054730184  |
| bio9      | 0.073953394  |
| bio1      | 0.157258365  |
| bio4      | 0.221289862  |
| bio6      | 0.264307391  |
| bio5      | 0.267815789  |
| bio10     | 0.36823738   |
| bio8      | 0.416192786  |
| bio14     | 0.472474418  |
| bio17     | 0.519613426  |
| bio19     | 0.551056474  |
| bio13     | 0.623121951  |
| bio18     | 0.637327428  |
| bio16     | 0.751531592  |
| bio12     | 0.876705637  |
